# Supplementary material for: Over-Expression of Superoxide Dismutase Ameliorates Cr(VI) Induced Adverse Effects via Modulating Cellular Immune System of Drosophila melanogaster
Source: PLOS journal article supplement (doi:10.1371/journal.pone.0088181), 2014-02-04
Supplement: S7 (10.1371/journal.pone.0088181.s007) [file journal.pone.0088181.s007]

**Table S1. Chromium level (ng/ml) in the hemocytes of different *Drosophila* larvae.**

|  | **Oregon R+** | | ***He-Gal4*** | | ***UAS-Sod*** | | ***He-Gal4>UAS-Sod*** | | ***UAS-Sod RNAi*** | | ***He-Gal4>UAS-Sod RNAi*** | |
| --- | --- | --- | --- | --- | --- | --- | --- | --- | --- | --- | --- | --- |
|  | **24 h** | **48 h** | **24 h** | **48 h** | **24 h** | **48 h** | **24 h** | **48 h** | **24 h** | **48 h** | **24 h** | **48 h** |
| **Control** | ND | ND | ND | ND | ND | ND | ND | ND | ND | ND | ND | ND |
| **5.0µg/ml** | 8.74±2.87 | 12.85±2.77 | 9.42±2.33 | 13.52±3.29 | 8.23±3.06 | 11.97±1.84 | 9.03±2.15 | 11.91±2.59 | 10.05±3.38 | 13.79±2.92 | 8.67±1.93 | 12.56±2.29 |
| **10.0µg/ml** | 11.59±1.97 | 20.59±4.54 | 11.92±1.95 | 22.45±5.19 | 10.74±2.31 | 23.35±5.42 | 12.87±2.52 | 21.84±4.34 | 12.95±3.69 | 21.85±5.63 | 12.38±3.46 | 19.84±6.11 |
| **20.0µg/ml** | 25.12±5.56 | 43.02±6.79 | 27.71±6.27 | 42.86±7.49 | 28.02±6.19 | 44.16±5.86 | 27.16±8.51 | 43.96±9.23 | 26.62±5.94 | 45.47±7.06 | 26.42±7.19 | 44.39±8.45 |

ND = not detected
